# Supplementary material
Source: Springer Nature journal article supplement (https://www.springermedizin.de/resource/supplementary/12885_2014_4727_MOESM1_ESM.pdf/9467122)
Supplement: MOESM1 [file 9467122]

## **Additional file 1.pdf**

### **Supplementary tables and figures**

**Table S1** List of siRNA sequences.

**Table S2** miRNAs significantly up regulated in MCF7 cells after exposure to hypoxia (0.1% O<sub>2</sub> for 48 h). Differentially expressed genes were identified using ANOVA (p<0.05).

**Table S3** miRNAs significantly down regulated in MCF7 cells after exposure to hypoxia (0.1% O<sub>2</sub> for 48 h). Differentially expressed genes were identified using ANOVA (p<0.05).

**Figure S1** Scatter plot of probe intensities of miRNAs expressed in MCF7 cells after hypoxia (0.1% O<sub>2</sub> 48 h) vs. normoxia. ▼ indicates miRNAs that were significantly down regulated in hypoxia, ▲ indicates miRNAs that were significantly up regulated in hypoxia. Differentially expressed genes were identified using ANOVA and FDR (p<0.05).

**Figure S2** Scatter plot of ratios between pre-miRNA/mature miRNA expression in MCF7 cells after hypoxia (0.1% O<sub>2</sub> 48 h) vs. normoxia.

**Figure S3** Scatter plot of ratios between pre-miRNA/mature miRNA in MCF7 cells after Dicer inhibition by transient transfection with siRNAs vs. normoxia.

**Figure S4** Dicer protein expression in MCF7 cells after Dicer inhibition by siRNA compared with control siRNA.

**Figure S5 Mature and precursor miR-185 and miR-21 expression in hypoxia**

**(1% O<sub>2</sub> for 24 h) vs. normoxia** A, Pre-miR-185 and miR-185 expression, precursor/mature ratio in HUVECs exposed to hypoxia (1% O<sub>2</sub> for 24 h) vs. normoxia. B, Pre-miR-21 and miR-21 expression, precursor/mature ratio in HIVECs exposed to hypoxia (1% O<sub>2</sub> for 24 h) vs. normoxia. Data represent normalized mean  $\pm$ S.E (error bars) (n=3). miRNA levels were analysed by RT-PCR and normalised to RNU6B levels.

**Figure S6 Mature and precursor miR-185 and miR-21 expression in hypoxia**

**(1% O<sub>2</sub> for 48 h) vs. normoxia** A, Pre-miR-185 and miR-185 expression, precursor/mature ratio in HUVECs exposed to hypoxia (1% O<sub>2</sub> for 48 h) vs. normoxia. B, Pre-miR-21 and miR-21 expression, precursor/mature ratio in HIVECs exposed to hypoxia (1% O<sub>2</sub> for 48 h) vs. normoxia. Data represent normalized mean  $\pm$ S.E (error bars) (n=3). miRNA levels were analysed by RT-PCR and normalised to RNU6B levels.

**Table S1** List of siRNA sequences.

| siRNA            | siRNA sequence                                                 | Company                             | Reference                     |
|------------------|----------------------------------------------------------------|-------------------------------------|-------------------------------|
| DICER            | 5'-UCCAGAGCUGCUUCAAGCATT-3'<br>5'-UGCUUGAAGCAGCUCUGGATT-3'     | Shanghai<br>GenePharma<br>Co., Ltd  | (Chu et al.,<br>2010)         |
| DROSHA           | 5-ACGAAGCUCGAUGAAGAUAUUATT-3'<br>5'-UAAAUCUUCAUCGAGCUUCGUTT-3' | Shanghai<br>GenePharma<br>Co., Ltd  | (Han et al.,<br>2012)         |
| TARBP2           | 5'-AAUUCACCAUGACCUGUCGAGTT-3'<br>5'-CUCGACAGGUCAUGGUGAAUUTT-3' | Shanghai<br>GenePharma<br>Co., Ltd  | (Christensen et<br>al., 2007) |
| HIF-1 $\alpha$   | 5'-CUGAUGACCAGCAACUUGAdTdT-3'<br>5'-UCAAGUUGCUGGUCAUCAGdTdT-3' | Dharmacon,<br>Lafayette, CO,<br>USA | (Sowter et al.,<br>2003)      |
| HIF-2 $\alpha$   | 5'-CAGCAUCUUUGAUAGCAGUdTdT-3'<br>5'-ACUGCUAUCAAAGAUGCUGdTdT-3' | Dharmacon,<br>Lafayette, CO,<br>USA | (Sowter et al.,<br>2003)      |
| PHD1             | 5'-CUAUAUCGUGCCCUGAUGTT-3'<br>5'-CAUGCAGGGCACGAUAUAGUC-3'      | Shanghai<br>GenePharma<br>Co., Ltd  | (Appelhoff et<br>al., 2004)   |
| PHD2             | 5'-GGACAUCCGAGGCGAUAAGTT-3'<br>5'-CUUAUCGCCUCGGAUGUCCTT-3'     | Shanghai<br>GenePharma<br>Co., Ltd  | (Appelhoff et<br>al., 2004)   |
| FIH-1            | 5'-CAGCGGCGGAGGCUGUGGCTT-3'<br>5'-GCCACAGCCUCCGCCGUCGTT-3'     | Shanghai<br>GenePharma<br>Co., Ltd  | (Stolze et al.,<br>2004)      |
| Control<br>siRNA | 5'-UUCUCCGAACGUGUCACGUTT-3'<br>5'-ACGUGACACGUUCGGAGAATT-3'     | Shanghai<br>GenePharma<br>Co., Ltd  |                               |

**Table S2** miRNAs significantly up regulated in MCF7 cells after exposure to hypoxia (0.1% O<sub>2</sub> for 48 h). Listed were differentially expressed miRNAs with p<0.05 so determined by ANOVA.

| <b>miRNA</b>    | <b>Fold-Change</b> | <b>p-value</b> |
|-----------------|--------------------|----------------|
| hsa-miR-3193    | 24.85              | 0.0349         |
| hsa-miR-210     | 8.05               | 0.0007         |
| hsa-miR-181a-3p | 7.33               | 0.0418         |
| hsa-miR-27a-5p  | 5.93               | 0.0104         |
| hsa-miR-23a-5p  | 3.01               | 0.0413         |
| hsa-miR-193b-5p | 2.76               | 0.0104         |
| hsa-miR-1972    | 1.71               | 0.0309         |
| hsa-miR-193b    | 1.68               | 0.0104         |

**Table S3** miRNAs significantly down regulated in MCF7 cells after exposure to hypoxia (0.1% O<sub>2</sub> for 48 h). Listed were differentially expressed miRNAs with p<0.05 so determined by ANOVA.

| <b>miRNA</b>   | <b>Fold-Change</b> | <b>p-value</b> |
|----------------|--------------------|----------------|
| hsa-miR-149    | -2.19              | 0.0077         |
| hsa-miR-205    | -2.47              | 0.0307         |
| hsa-miR-33b-3p | -5.12              | 0.0360         |
| hsa-miR-4521   | -7.35              | 0.0008         |

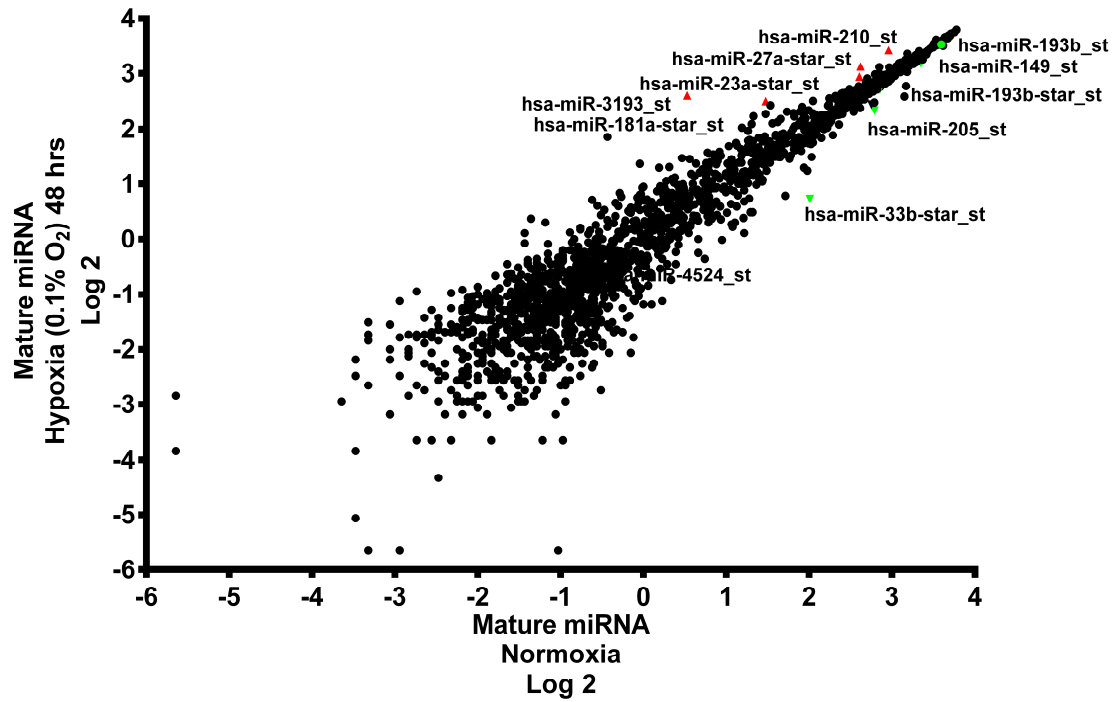

**Figure S1 Microarray analysis.** Scatter plot of probe intensities of miRNAs expressed in MCF7 cells after hypoxia (0.1% O<sub>2</sub> 48 h) vs. normoxia. ▼ indicates miRNAs that were significantly down regulated in hypoxia, ▲ indicates miRNAs that were significantly up regulated in hypoxia. Differentially expressed genes were identified using ANOVA and FDR (p<0.05).

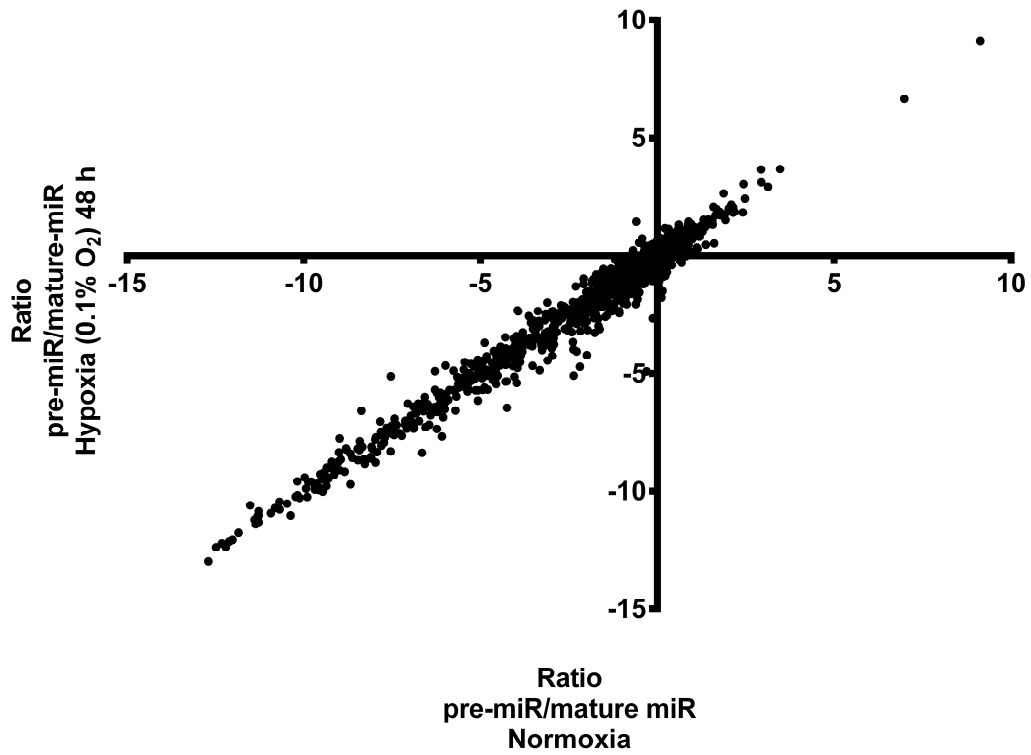

**Figure S2** Scatter plot of ratios between pre-miRNA/mature miRNA levels in MCF7 cells after hypoxia (0.1% O<sub>2</sub> 48 h) vs. normoxia as determined using microarray analysis.

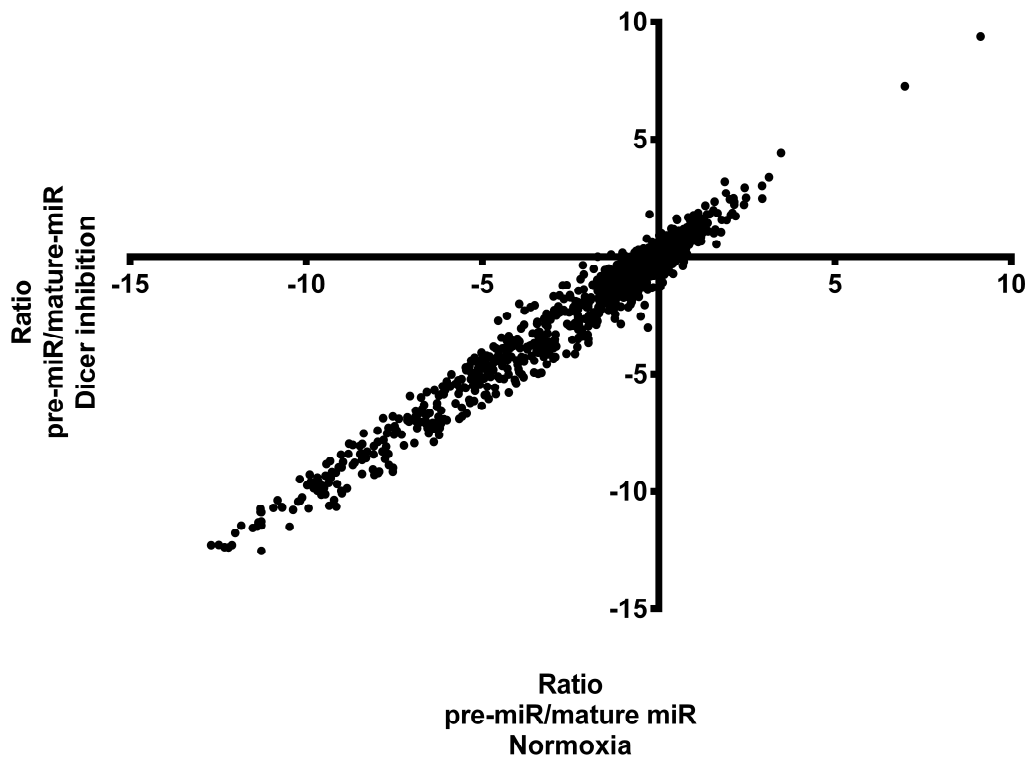

**Figure S3** Scatter plot of ratios between pre-miRNA/mature miRNA in MCF7 cells after Dicer inhibition by transient transfection with siRNAs vs. normoxia.

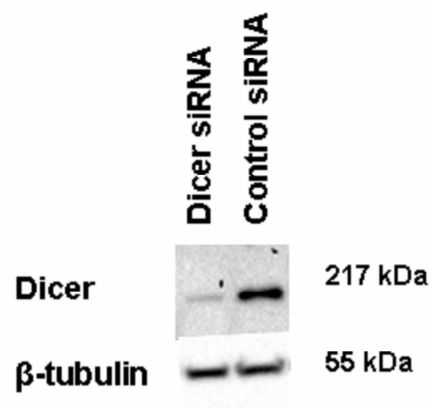

**Figure S4 A**, Dicer protein expression in MCF7 cells after Dicer inhibition by siRNA compared with control siRNA.  $\beta$ -tubulin was used as the loading control.



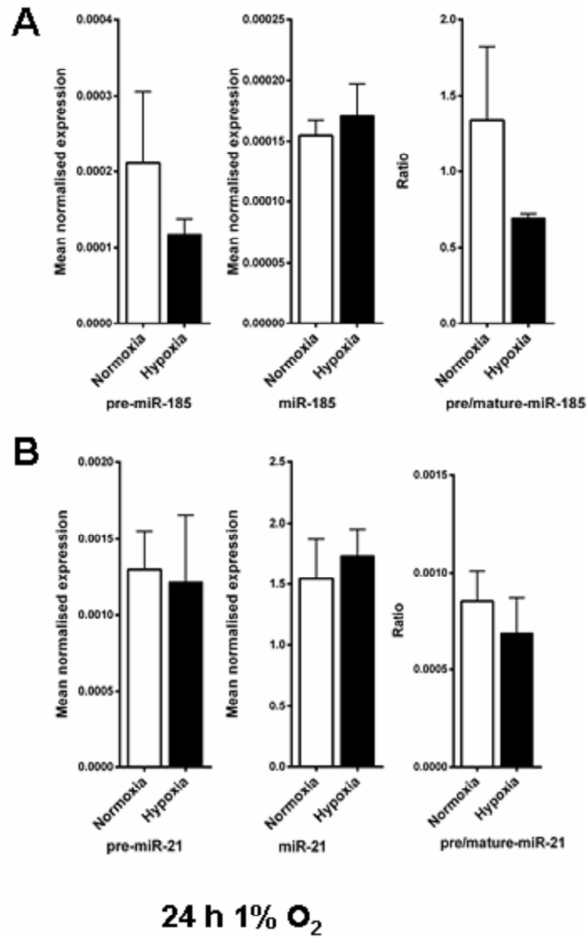

**Figure S5 Mature and precursor miR-185 and miR-21 expression in hypoxia (1% O<sub>2</sub> for 24 h) vs. normoxia** A, Pre-miR-185 and miR-185 expression, precursor/mature ratio in HUVECs exposed to hypoxia (1% O<sub>2</sub> for 24 h) vs. normoxia. B, Pre-miR-21 and miR-21 expression, precursor/mature ratio in HIVECs exposed to hypoxia (1% O<sub>2</sub> for 24 h) vs. normoxia. Data represent normalized mean  $\pm$ S.E (error bars) (n=3). miRNA levels were analysed by RT-PCR and normalised to RNU6B levels.

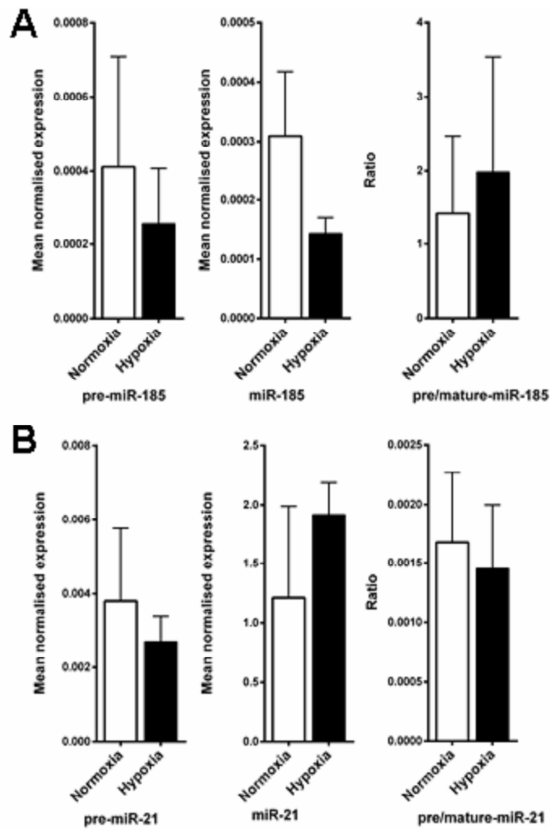

**48 h 1% O<sub>2</sub>**

**Figure S6 Mature and precursor miR-185 and miR-21 expression in hypoxia**

**(1% O<sub>2</sub> for 48 h) vs. normoxia** A, Pre-miR-185 and miR-185 expression, precursor/mature ratio in HUVECs exposed to hypoxia (1% O<sub>2</sub> for 48 h) vs. normoxia. B, Pre-miR-21 and miR-21 expression, precursor/mature ratio in HIVECs exposed to hypoxia (1% O<sub>2</sub> for 48 h) vs. normoxia. Data represent normalized mean ±S.E (error bars) (n=3). miRNA levels were analysed by RT-PCR and normalised to RNU6B levels.
